# Supplementary material for: Efficient photocatalytic water splitting through titanium silicalite stabilized CoO nanodots
Source: Royal Society of Chemistry journal article supplement (doi:10.1039/c9nr05057d), 2019-01-01
Supplement: c9nr05057d1.pdf [file c9nr05057d1.pdf]

## Supporting Information

### **Efficient photocatalytic water splitting through titanium silicalite stabilized CoO nanodots**

Mengmeng Zhu,<sup>a§</sup> Cheng Zhu,<sup>a§</sup> Dan Wu,<sup>a</sup> Xiao Wang,<sup>a</sup> Huibo Wang,<sup>a</sup> Jin Gao,<sup>a</sup> Hui Huang,<sup>\*a</sup>

Chunfeng Shi,<sup>\*b</sup> Yang Liu,<sup>\*a</sup> and Zhenhui Kang<sup>\*a</sup>

a Institute of Functional Nano and Soft Materials Laboratory (FUNSOM), Jiangsu Key Laboratory for Carbon-Based Functional Materials & Devices, Soochow University, 199 Ren'ai Road, Suzhou, 215123, Jiangsu, PR China.

b State Key Laboratory of Catalytic Materials and Reaction Engineering, Research Institute of Petroleum Processing, SINOPEC, No. 18 Xueyuan Road, Beijing 100083, China

\*Correspondence to: hhuang0618@suda.edu.cn, shicf.ripp@sinopec.com, yangl@suda.edu.cn, zhkang@suda.edu.cn

§ These authors contributed equally to this work.

## 1. Experimental section

### 1.1. Synthesis of CoO

For comparison, CoO was fabricated through a similar procedure to CoO-TS-1. Certain amount of CoCl<sub>2</sub>·6H<sub>2</sub>O was directly put into a porcelain boat and calcinated at 900 °C in a tube furnace under N<sub>2</sub> atmosphere for 4 h. The collected black powder was denoted as CoO.

### 1.2. Determination of the bandgap ( $E_g$ )

The bandgap of the catalyst was calculated according to the following equation:

$$\alpha = A(h\nu - E_g)^{n/2} / h\nu \quad (\text{S1})$$

where  $\alpha$ , A, h,  $\nu$  and  $E_g$  correspond to the absorption coefficient, proportionality constant, Planck's constant, frequency of the incident light and band energy, respectively (n in the index is equal to 1 for direct band gap, 4 for indirect band gap).<sup>1</sup>

### 1.3. Determination of the electron transfer number ( $n$ )

The electron transfer number was determined through a rotating disk-ring electrodes (RRDE) testing system (RRDE-3A, ALS Co. Ltd). The experiments were carried out in N<sub>2</sub> saturated ultrapure water with a scan rate of 10 mV·s<sup>-1</sup> and a rotating speed of 1600 rpm. A CHI 920C electrochemical workstation (CH Instruments, Shanghai, China) was employed to record the data. The electron transfer number ( $n$ ) can be calculated according to the following equation:

$$n = \frac{4I_d}{I_d + I_r/N} \quad (\text{S2})$$

where  $I_d$  and  $I_r$  represent the disk and ring current, respectively, and N is the

rotating disk-ring electrode (RRDE) collection efficiency determined to be 0.24.<sup>2</sup>

## 2. Supplementary tables.

**Table S1.** Inductively Coupled Plasma (ICP) result of CoO content in CoO-TS-1.

| Sample   | CoO mass fraction (%) |
|----------|-----------------------|
| CoO-TS-1 | 0.5                   |

**Table S2.** The Brunauer-Emmett-Teller (BET) specific surface area and average pore width of CoO-TS-1 and TS-1.

| Sample   | Specific surface area (m <sup>2</sup> g <sup>-1</sup> ) | Average pore width (nm) |
|----------|---------------------------------------------------------|-------------------------|
| CoO-TS-1 | 436.90                                                  | 4.07                    |
| TS-1     | 322.87                                                  | 3.88                    |

### 3. Supplementary Figures.

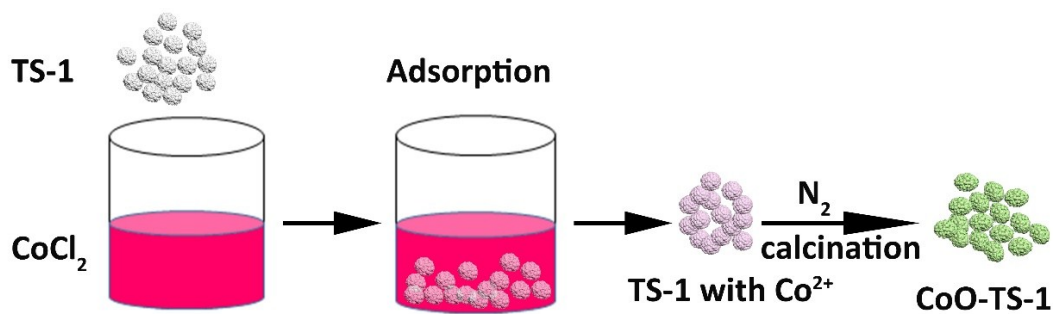

**Fig. S1.** The schematic diagram for the synthetic process of CoO-TS-1 photocatalysts.

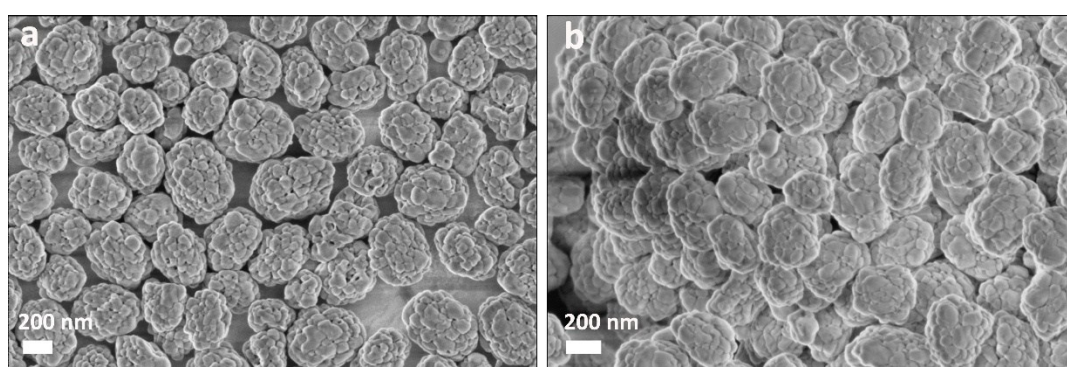

**Fig. S2.** SEM images of (a) TS-1 and (b) CoO-TS-1.

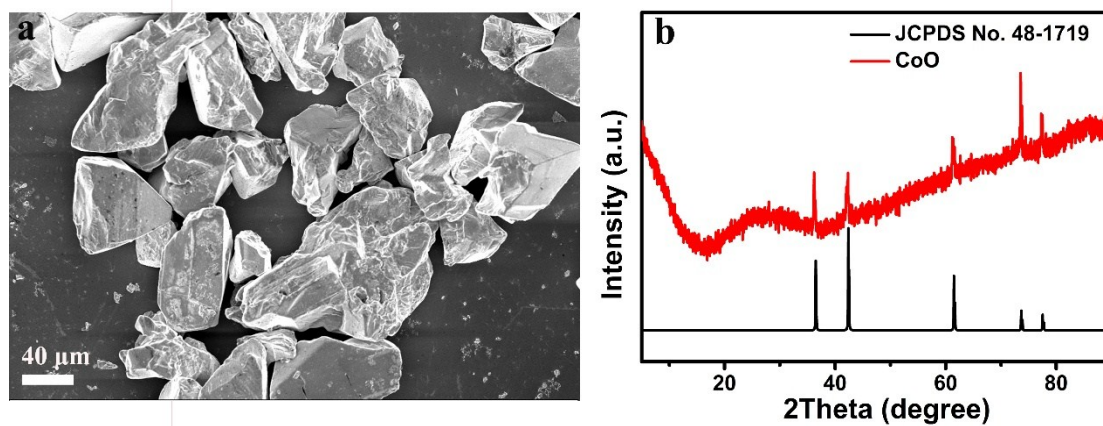

**Fig. S3.** (a) SEM images and (b) XRD spectrum of CoO.

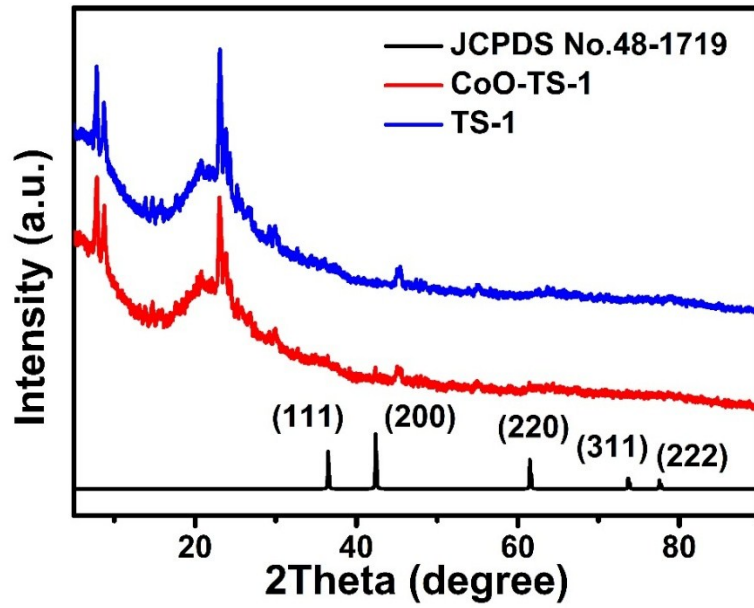

Fig. S4. XRD spectra of TS-1 and CoO-TS-1.

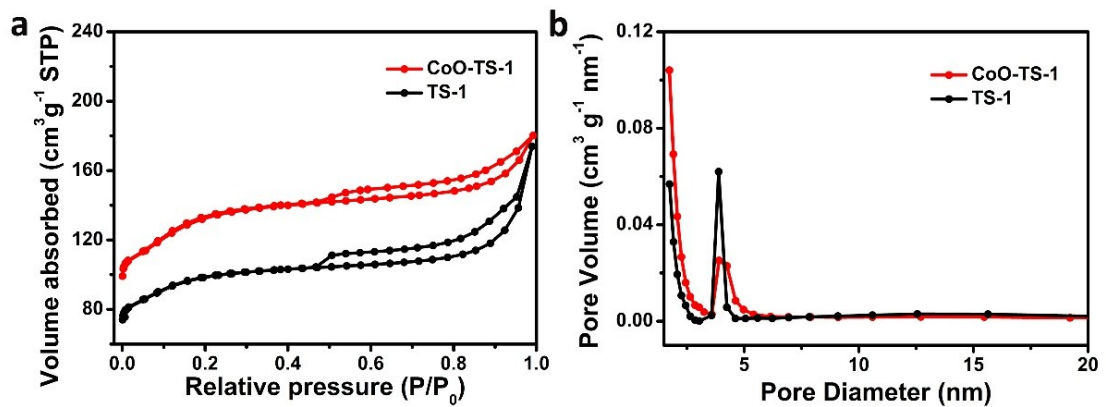

Fig. S5. (a)  $\text{N}_2$  adsorption–desorption isotherms for CoO-TS-1 and TS-1. (b) The pore-size distribution curves for CoO-TS-1 and TS-1.

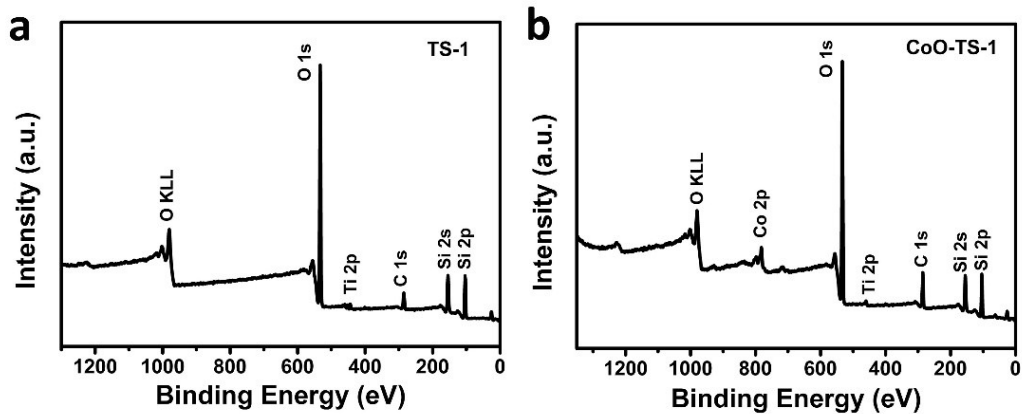

**Fig. S6.** Full XPS survey spectra of (a) TS-1 and (b) CoO-TS-1.

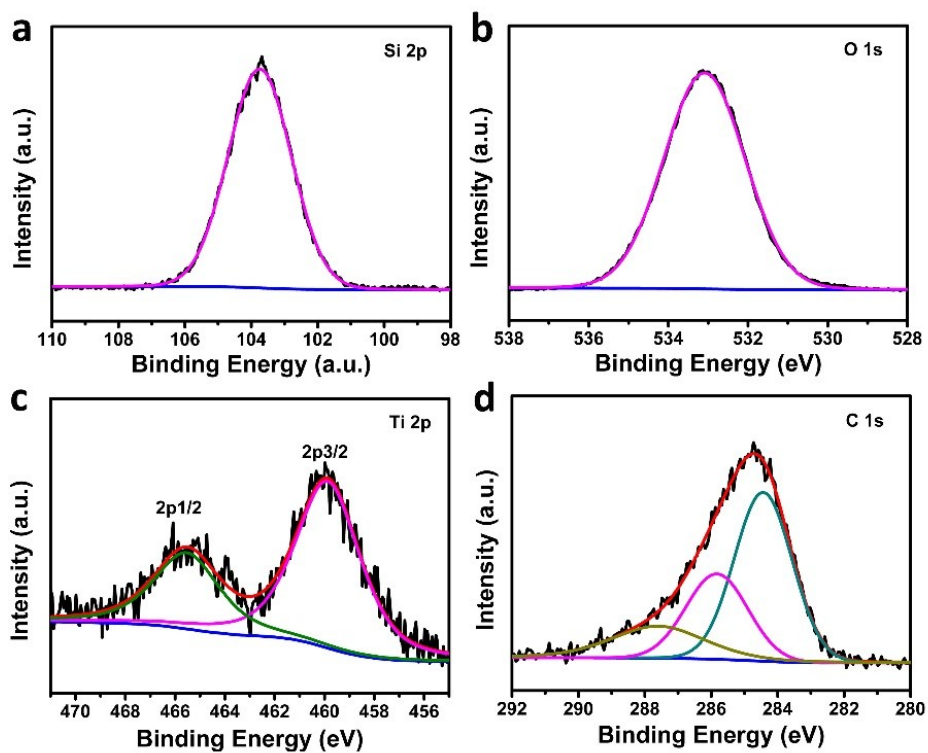

**Fig. S7.** High-resolution XPS spectra of (a) Si 2p, (b) O 1s, (c) Ti 2p and (d) C 1s for TS-1.

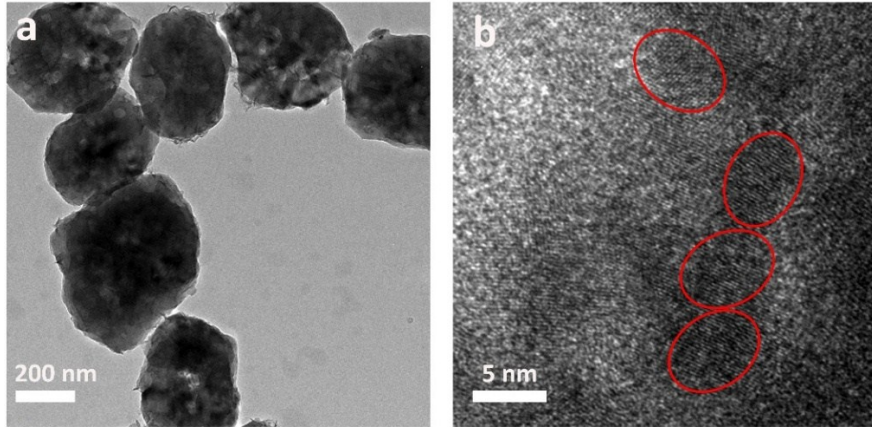

**Fig. S8.** (a) TEM and (b) HRTEM images of CoO-TS-1 after photocatalytic water splitting.

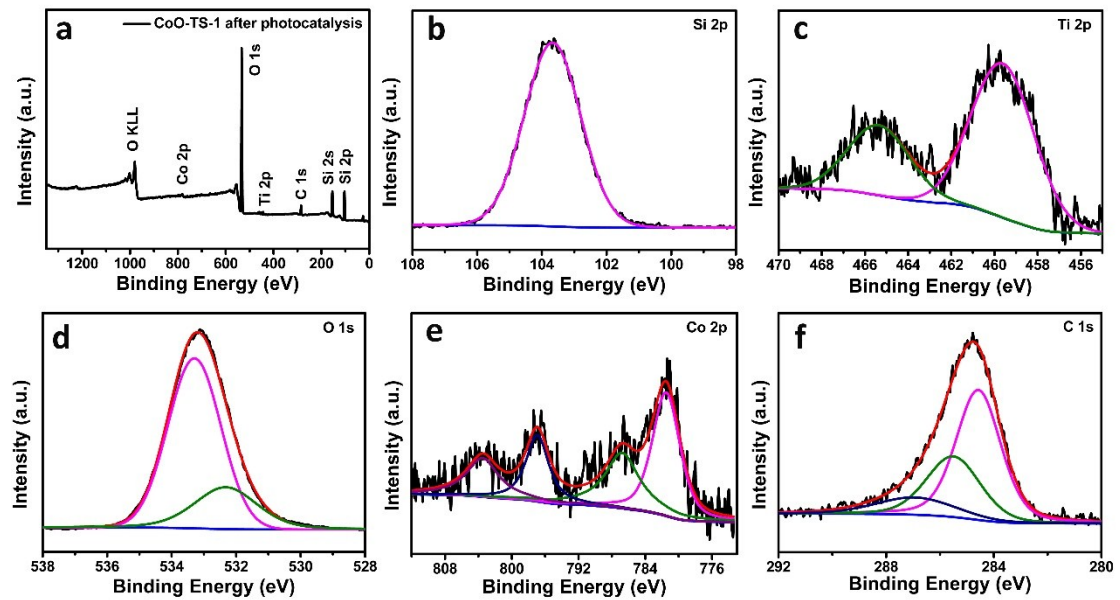

**Fig. S9.** (a) Full XPS survey spectrum and high-resolution XPS spectra of (b) Si 2p, (c) Ti 2p, (d) O 1s, (e) Co 2p and (f) C 1s for CoO-TS-1 after photocatalytic water splitting.



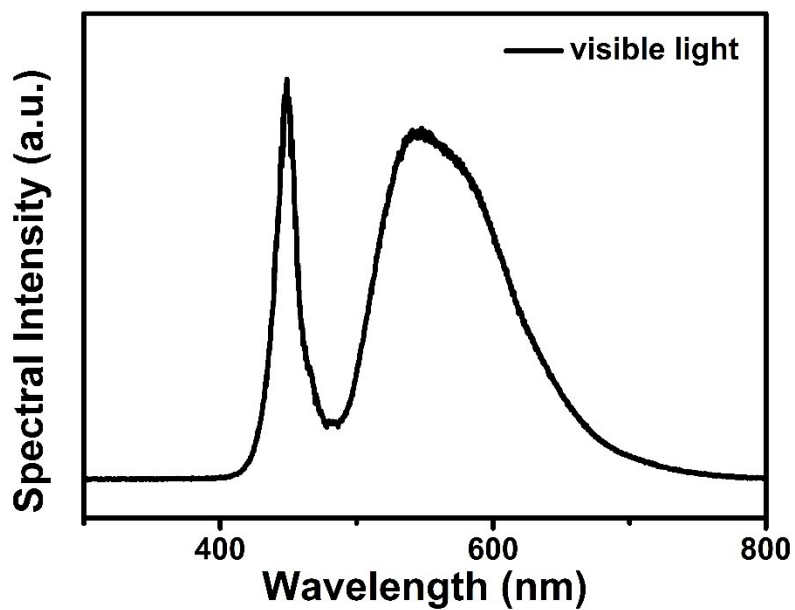

Fig. S10. Optical spectrum of the multi-channel photocatalytic reaction system.

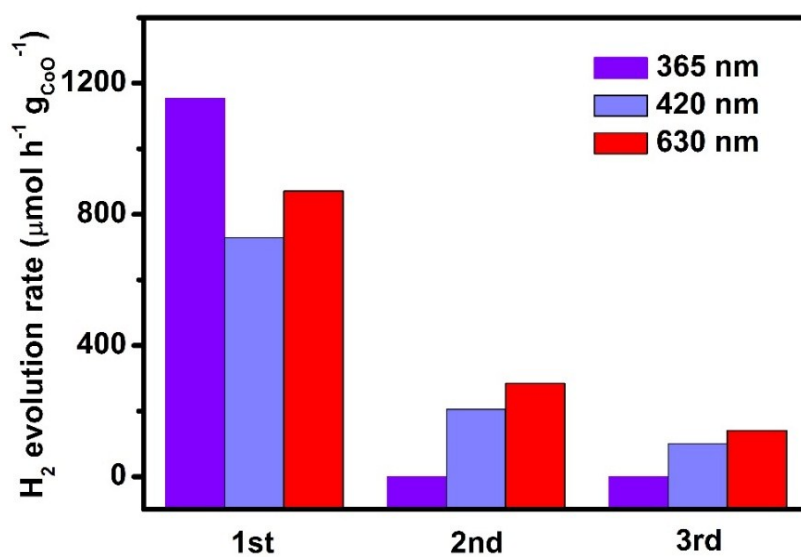

Fig. S11. Photostability of CoO-TS-1 towards water splitting with the specific incident light sources.

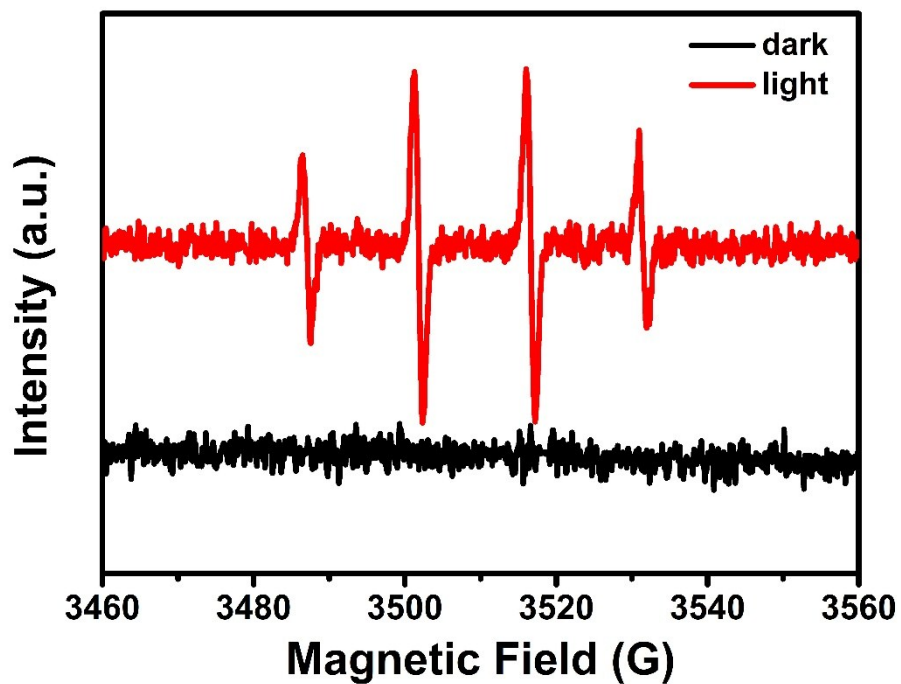

**Fig. S12.** EPR spectra for DMPO·OH of CoO-TS-1 under dark and light irradiation.

#### References

- S1. Zhu, C. Liu, Y. Zhou, Y. Fu, S. Guo, H. Li, S. Zhao, H. Huang, Y. Liu and Z. Kang, *Appl. Catal. B Environ.*, 2017, **216**, 114–121.
- S2 M. Zhu, M. Han, C. Zhu, L. Hu, H. Huang, Y. Liu and Z. Kang, *J. Colloid Interface Sci.*, 2018, **530**, 256–263.
